# Supplementary material
Source: ML conference proceedings conference paper supplement (https://openreview.net/forum?id=CGQnW4raNE)
Supplement: supplementary_material [file attachment]

## A FEDAVG PSEUDO-CODE

---

**Input:** Number of communication rounds  $T$ ; number of clients  $K$ ; local epochs  $E$ ; learning rate  $\eta$ ; Initial global model weights  $w^0$

---

```

for  $t = 0, 1, \dots, T - 1$  do
  Server broadcasts  $w^t$  to all participating clients;
  for each client  $k \in \{1, \dots, K\}$  do in parallel
     $w_k^{t,0} \leftarrow w^t$ ;
    for  $e = 1, \dots, E$  do
      for each minibatch  $b$  in local data  $\mathcal{D}^{(k)}$  do
         $w_k^{t,e} \leftarrow w_k^{t,e-1} - \eta \nabla \mathcal{L}^{(k)}(w_k^{t,e-1}; b)$ ;
      end
    end
    Client  $k$  sends updated weights  $w_k^{t,E}$  to server;
    Let  $n_k$  be the local sample size for client  $k$ ;
  end
  Server aggregates updates:
   $ntot = \sum_k n_k$ ;
   $w^{t+1} = \sum_k \frac{n_k}{ntot} w_k^{t,E}$ ;
end
Output: Final global model weights  $w^T$ 

```

---

**Algorithm 1:** Federated Training Protocol with FedAvg
